# Supplementary material for: Diversity and Anti-infectious Components of Cultivable Rhizosphere Fungi Derived from Three Species of Astragalus Plants in Northwestern Yunnan, China
Source: Preprints.org preprint supplement (doi:10.20944/preprints202408.1238.v1), 2024-08-16
Supplement: Supplementary file 1 [file supplementary]

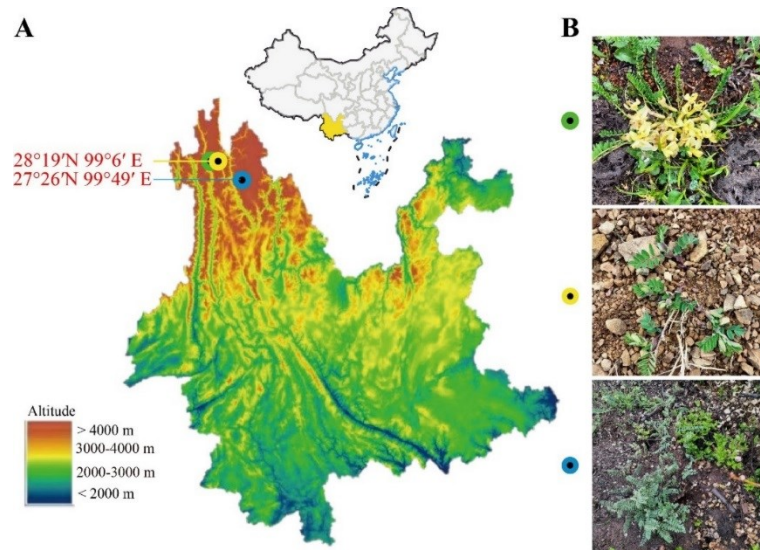

**Figure S1** Map of sampling sites in the northwestern area of Yunnan province, China (A). In the picture B, the green dot is sampling site for *Astragalus acaulis* (Aa) growing in high altitude grassland of 4,353 m; as shown in the yellow dot, *A. ernestii* (AE) grows in the steep slopes of flowstone beaches of 4,048 m; The blue dot shows the *A. forrestii* (Af) survival environment, surrounded by more pine trees and deciduous foliage of 3,225 m [1].

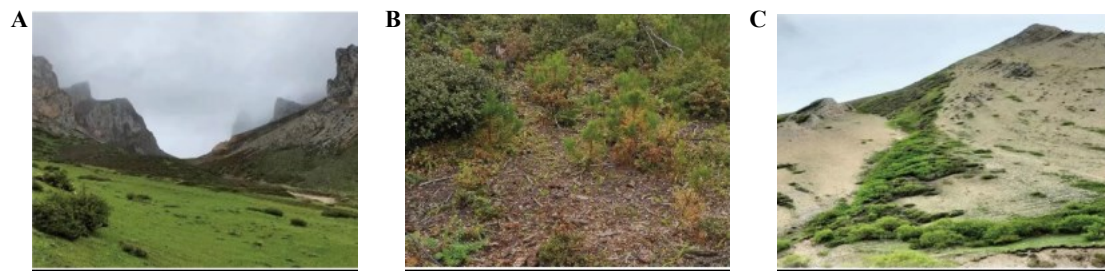

**Figure S2** The plants of *Astragalus acaulis* (Aa) grows in alpine grassland (A), *A. forrestii* (Af) is surrounded by more pine trees and deciduous foliage (B), *A. ernestii* (Ae) grows in the steep slopes of flowstone beaches (C) [1].

**Table S1** A total of 7, 2 and 4 unique genera identified in the rhizosphere fungal community of *Astragalus acaulis* (Aa), *A. forrestii* (Af) and *A. ernestii* (Ae), respectively.

| the name of fungal genera of<br>Aa rhizosphere | the name of fungal genera of Af<br>rhizosphere | the name of fungal genera of<br>Ae rhizosphere |
|------------------------------------------------|------------------------------------------------|------------------------------------------------|
| <i>Truncatella</i>                             | <i>Lecanicillium</i>                           | <i>Leptosphaeria</i>                           |
| <i>Cordyceps</i>                               | <i>Umbelopsis</i>                              | <i>Fusarium</i>                                |
| <i>Exophiala</i>                               |                                                | <i>Nemania</i> ,                               |
| <i>Beauveria</i>                               |                                                | <i>Aporospora</i>                              |
| <i>Samsoniella</i>                             |                                                |                                                |
| <i>Neonectria</i>                              |                                                |                                                |
| <i>Pseudogymnoascus</i>                        |                                                |                                                |

**Table S2** A total of 10, 15 and 7 unique species identified in the rhizosphere fungal community of *Astragalus acaulis* (Aa), *A. forrestii* (Af) and *A. ernestii* (Ae), respectively.

| the name of fungal species of<br>Aa rhizosphere | the name of fungal species of<br>Af rhizosphere | the name of fungal species of<br>Ae rhizosphere |
|-------------------------------------------------|-------------------------------------------------|-------------------------------------------------|
| <i>Penicillium wellingtonense</i>               | <i>Penicillium vasconiae</i>                    | <i>Penicillium brevicompactum</i>               |
| <i>Aspergillus calidoustus</i>                  | <i>P. suaveolens</i>                            | <i>Aspergillus niger</i>                        |
| <i>Mortierella clonocystis</i>                  | <i>P. thomii</i>                                | <i>Trichoderma longibrachiatum</i>              |
| <i>Truncatella angustata</i>                    | <i>Aspergillus versicolor</i>                   | <i>Leptosphaeria sclerotoides</i>               |
| <i>Cordyceps farinosa</i>                       | <i>A. tabacinus</i>                             | <i>Fusarium solani</i>                          |
| <i>Exophiala tremulae</i>                       | <i>Mortierella minutissima</i>                  | <i>Nemania diffusa</i>                          |
| <i>Beauveria pseudobassiana</i>                 | <i>M. verticillata</i>                          | <i>Aporospora terricola</i>                     |
| <i>Samsoniella hepiali</i>                      | <i>Trichoderma paraviridescens</i>              |                                                 |
| <i>Neonectria radicola</i>                      | <i>T. koningiopsis</i>                          |                                                 |
| <i>Pseudogymnoascus roseus</i>                  | <i>T. viride</i>                                |                                                 |
|                                                 | <i>T. longipile</i>                             |                                                 |
|                                                 | <i>Lecanicillium aphanocladii</i>               |                                                 |
|                                                 | <i>Umbelopsis vinacea</i>                       |                                                 |
|                                                 | <i>U. ramanniana</i>                            |                                                 |
|                                                 | <i>U. nana</i>                                  |                                                 |

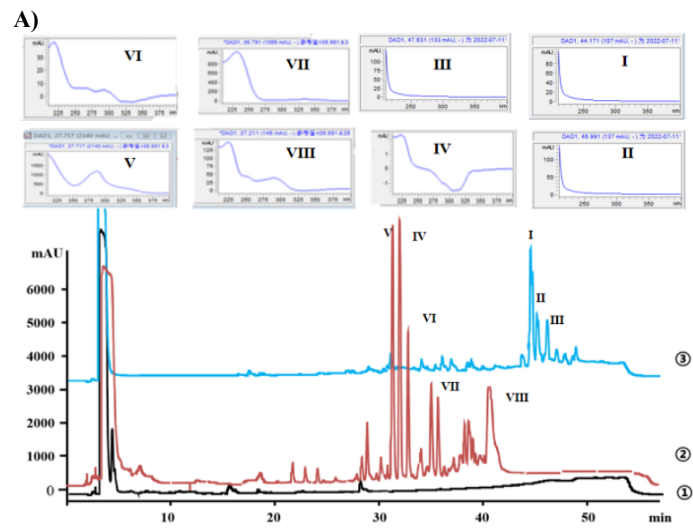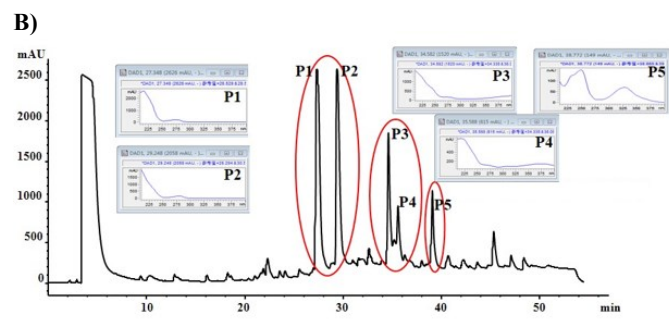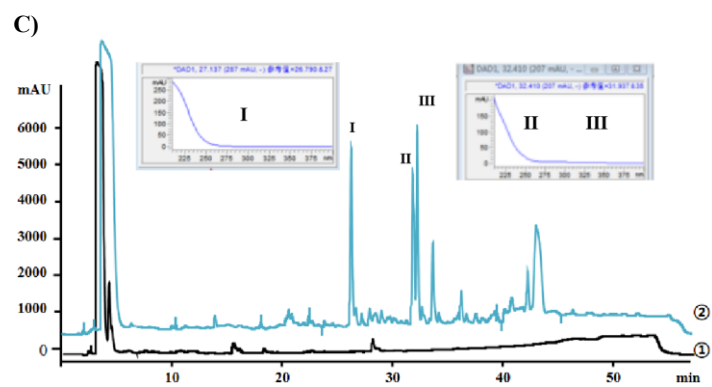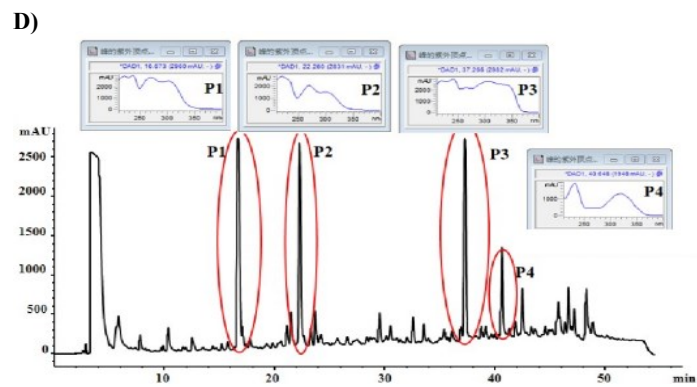

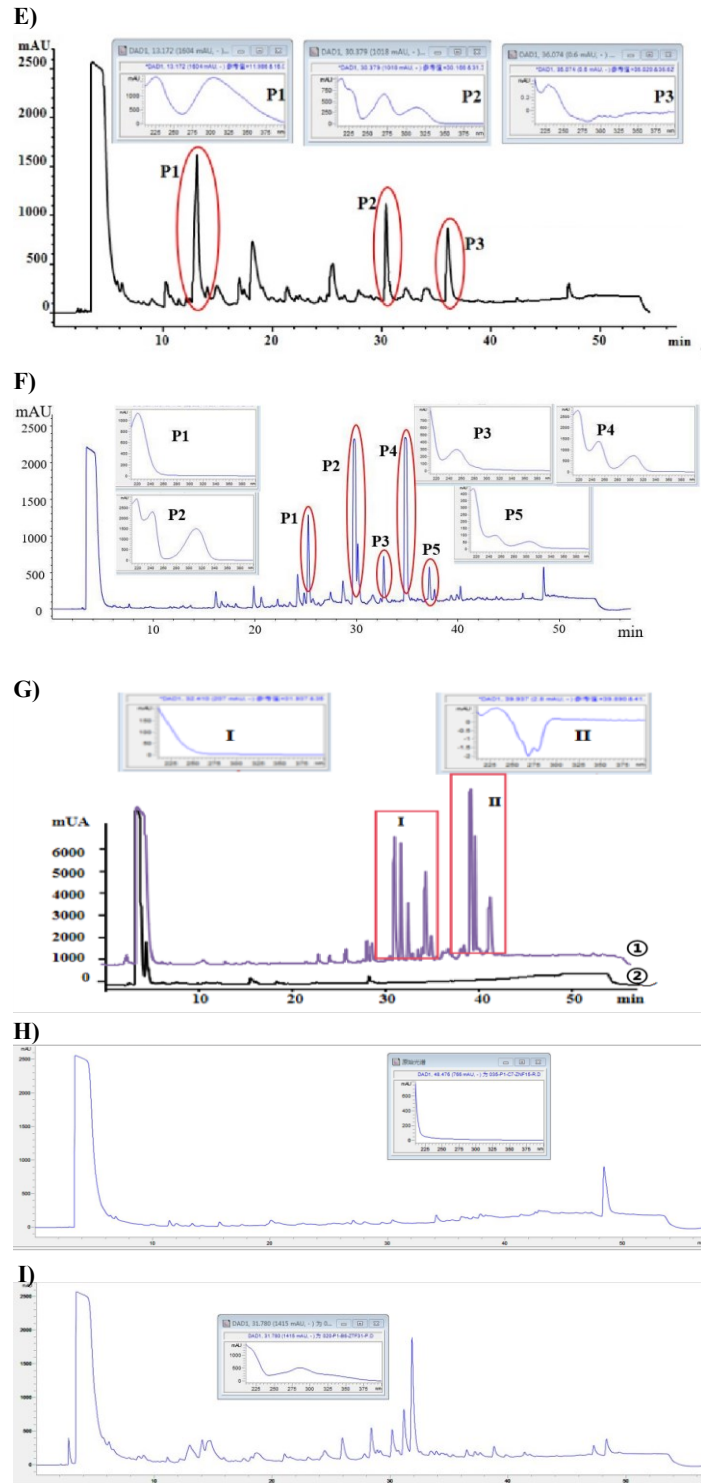

**Figure S3** HPLC spectra of the crude ethyl acetate (EA) extracts of fermented substrates of *Aspergillus calidoustus* AA12 (A③) and other nine target fungal strains of *A. fumigatus* AA15 (A②), *A. tabacinus* AF16 (B), *Penicillium polonicum* AA17 (C②), *Penicillium vasconiae* AF5 (D), *P. glabrum* AF3-1 (E), *P. brevicompactum* AE7 (F), *Cordyceps farinosa* AA8 (G), *Lecanicillium aphanocladii* AF15 (H), and *Umbelopsis nana* AF31 (I).

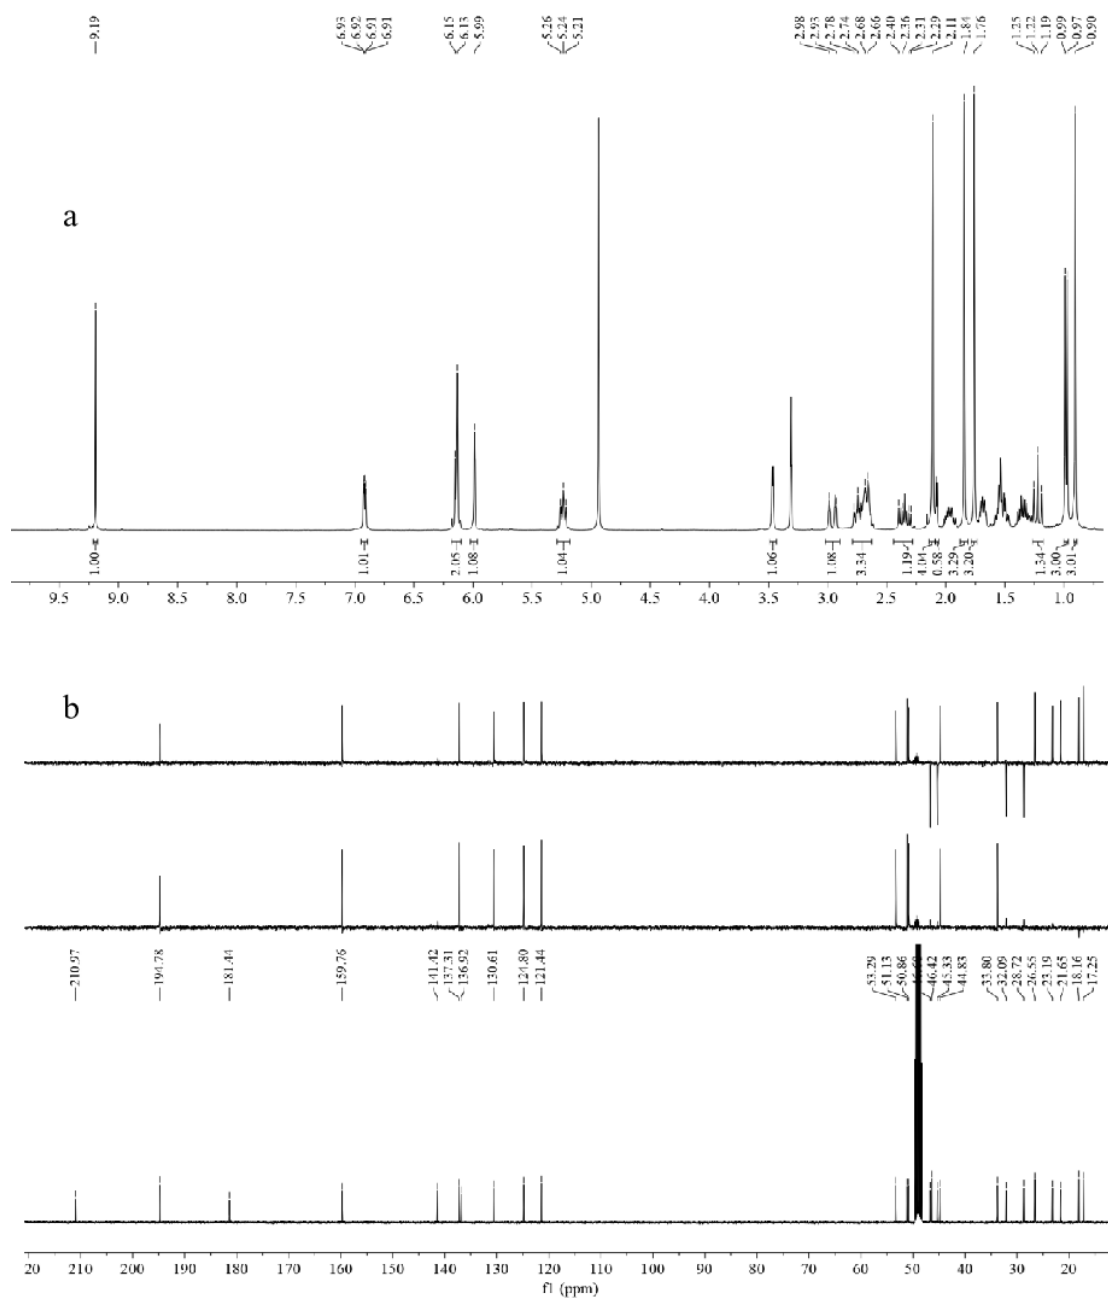

**Figure S4**  $^1\text{H}$  (a) and  $^{13}\text{C}$  (b) NMR spectrum of 6-epi-ophiobolin G (**1**).

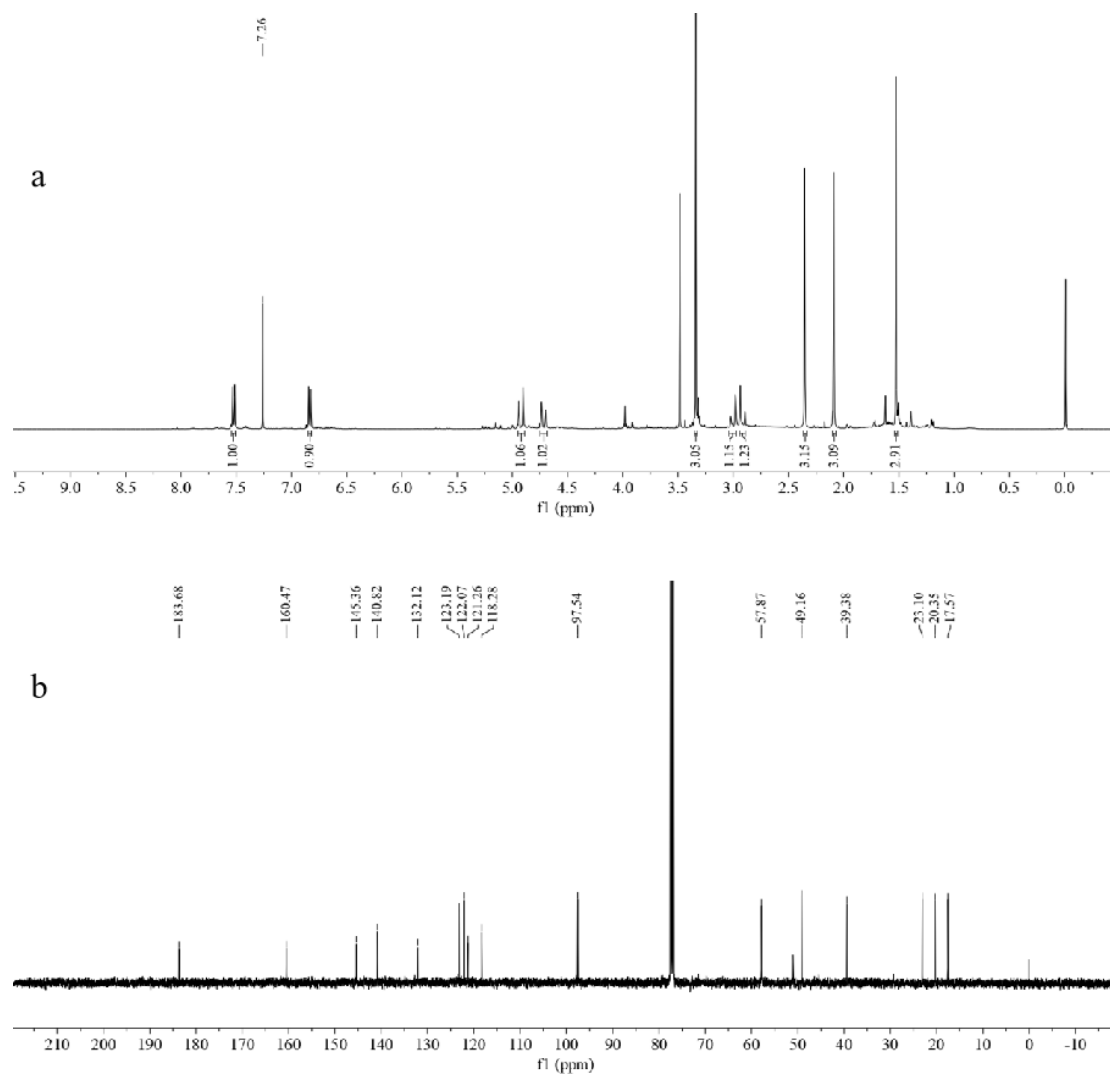

**Figure S5**  $^1\text{H}$  (a) and  $^{13}\text{C}$  (b) NMR spectrum of penicisochroman A (**2**).

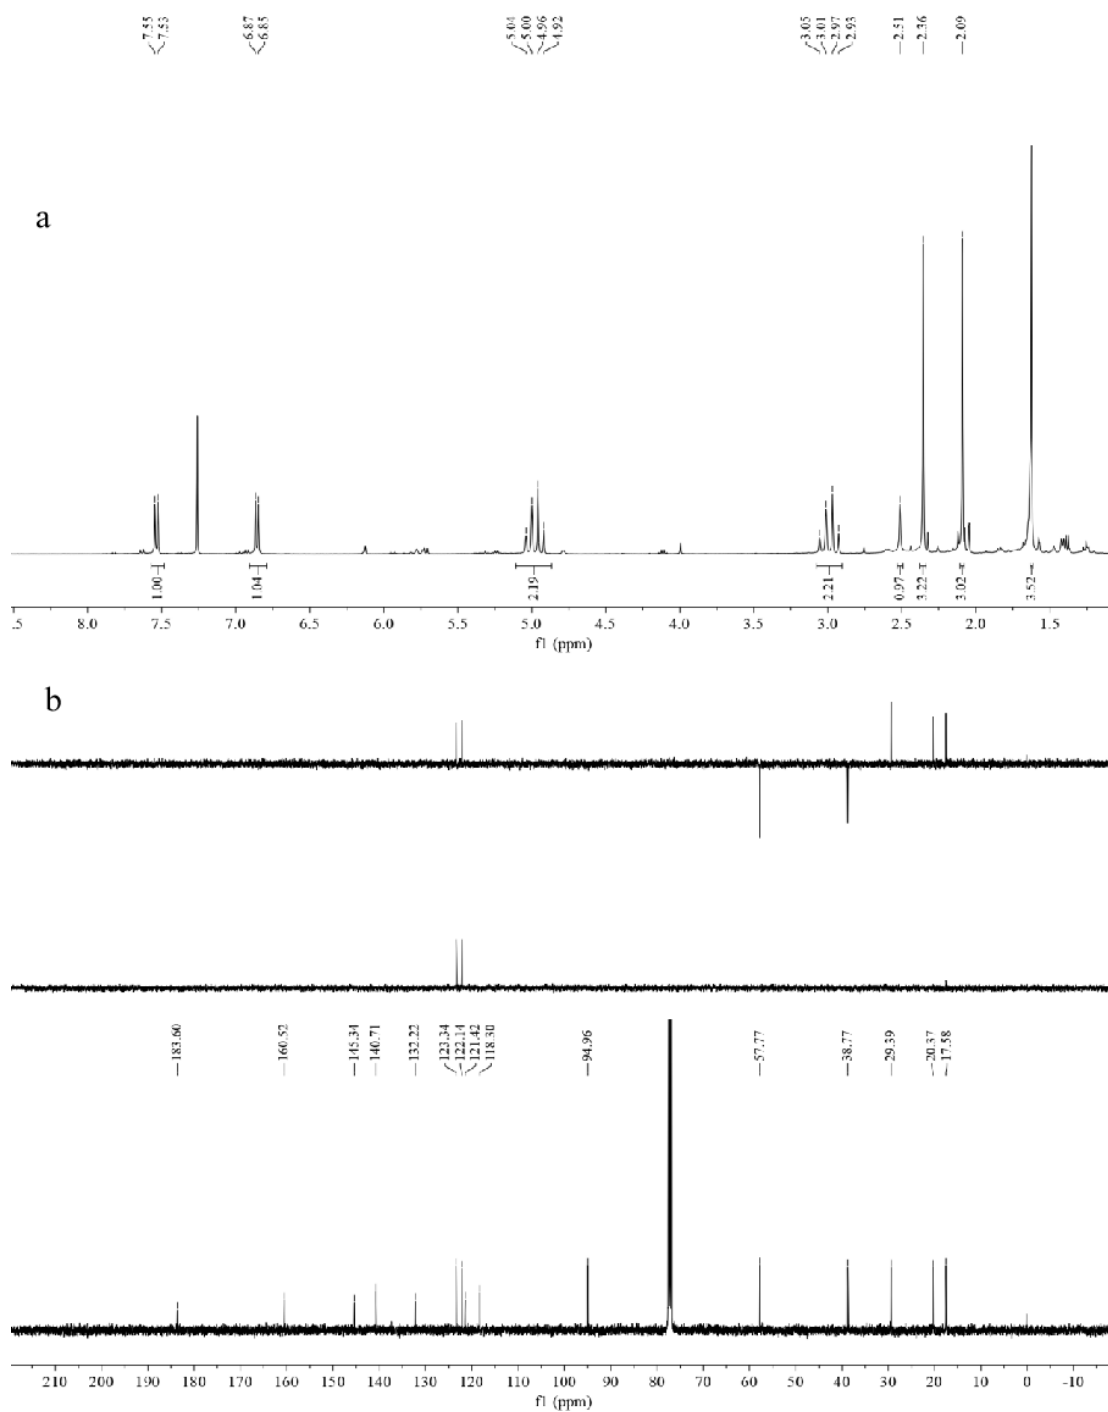

**Figure S6**  $^1\text{H}$  (a) and  $^{13}\text{C}$  (b) NMR spectrum of pergillin (**3**).

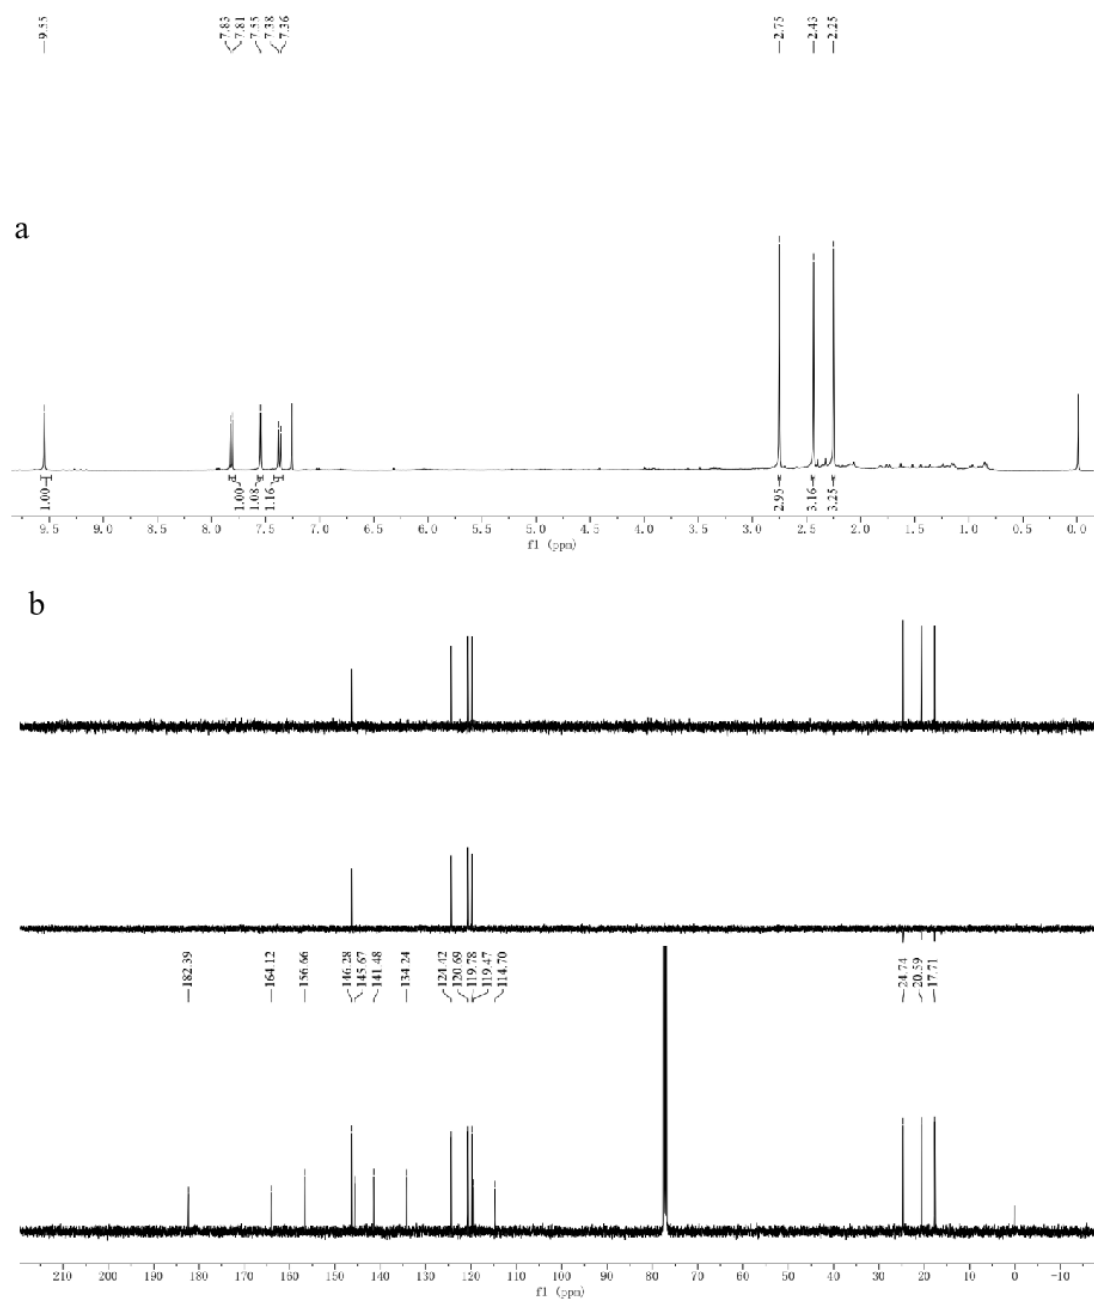

**Figure S7**  $^1\text{H}$  (a) and  $^{13}\text{C}$  (b) NMR spectrum of 7-methyl-2-(1-methylethylethlidene)-furo[3,2-H]isoquinoline-3-one (4).



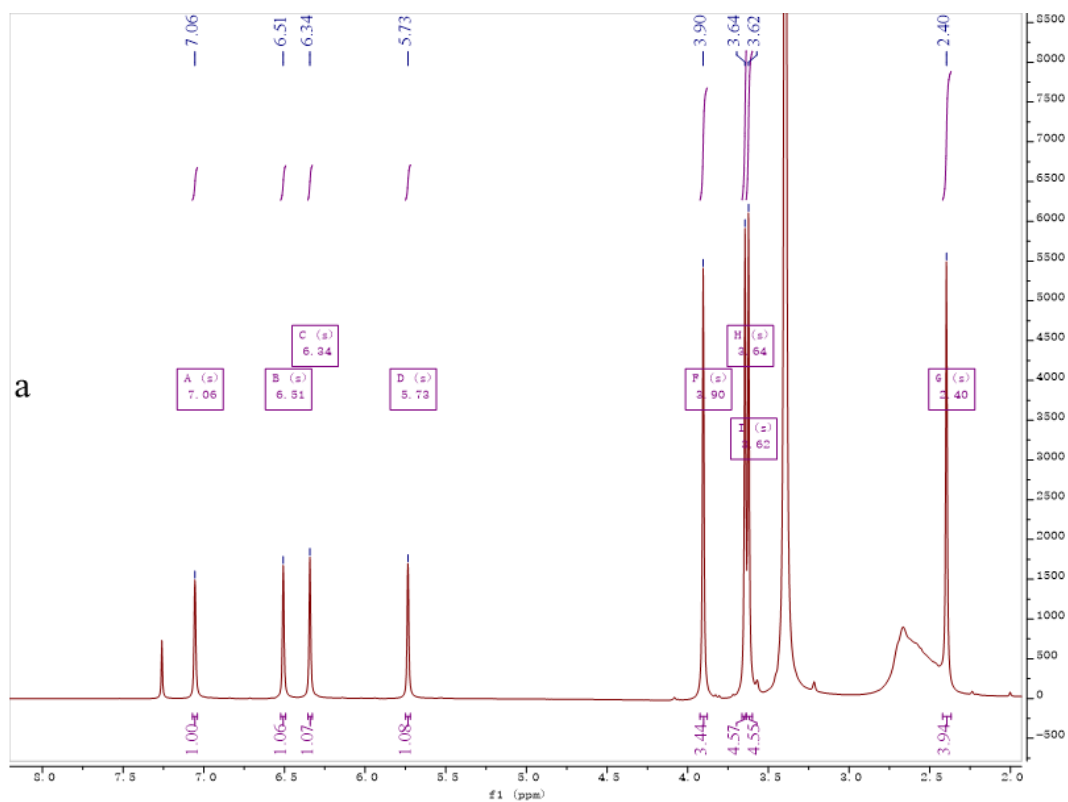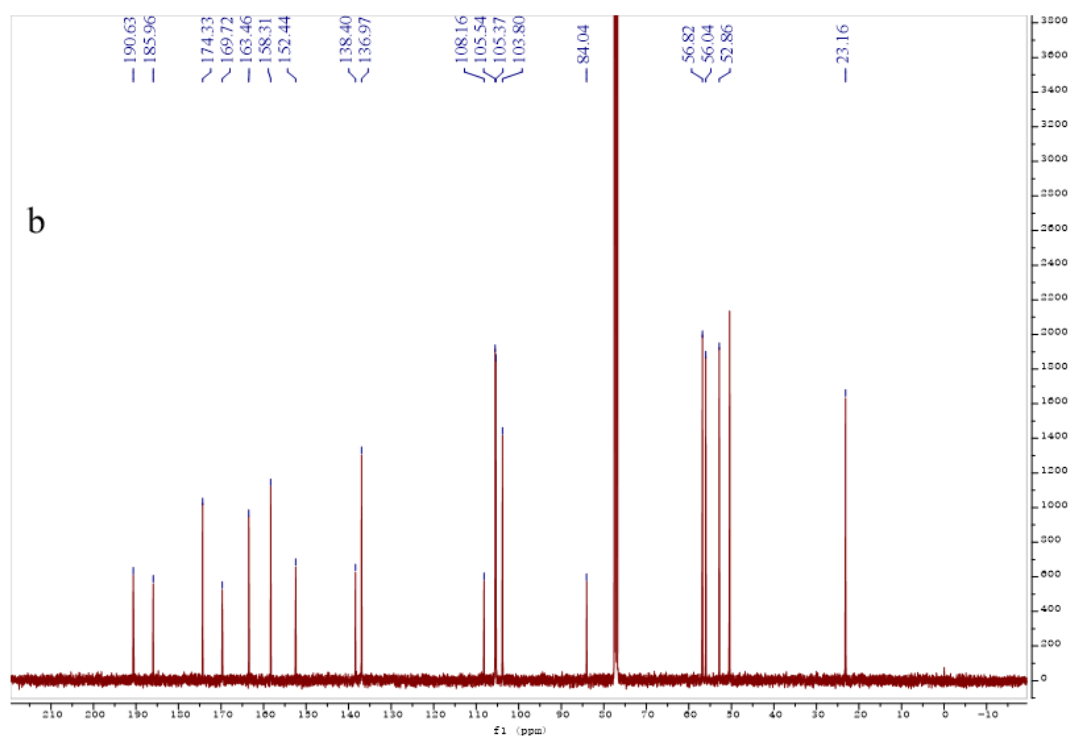

**Figure S8**  $^1\text{H}$  (a) and  $^{13}\text{C}$  (b) NMR spectrum of trypacidin (**5**).

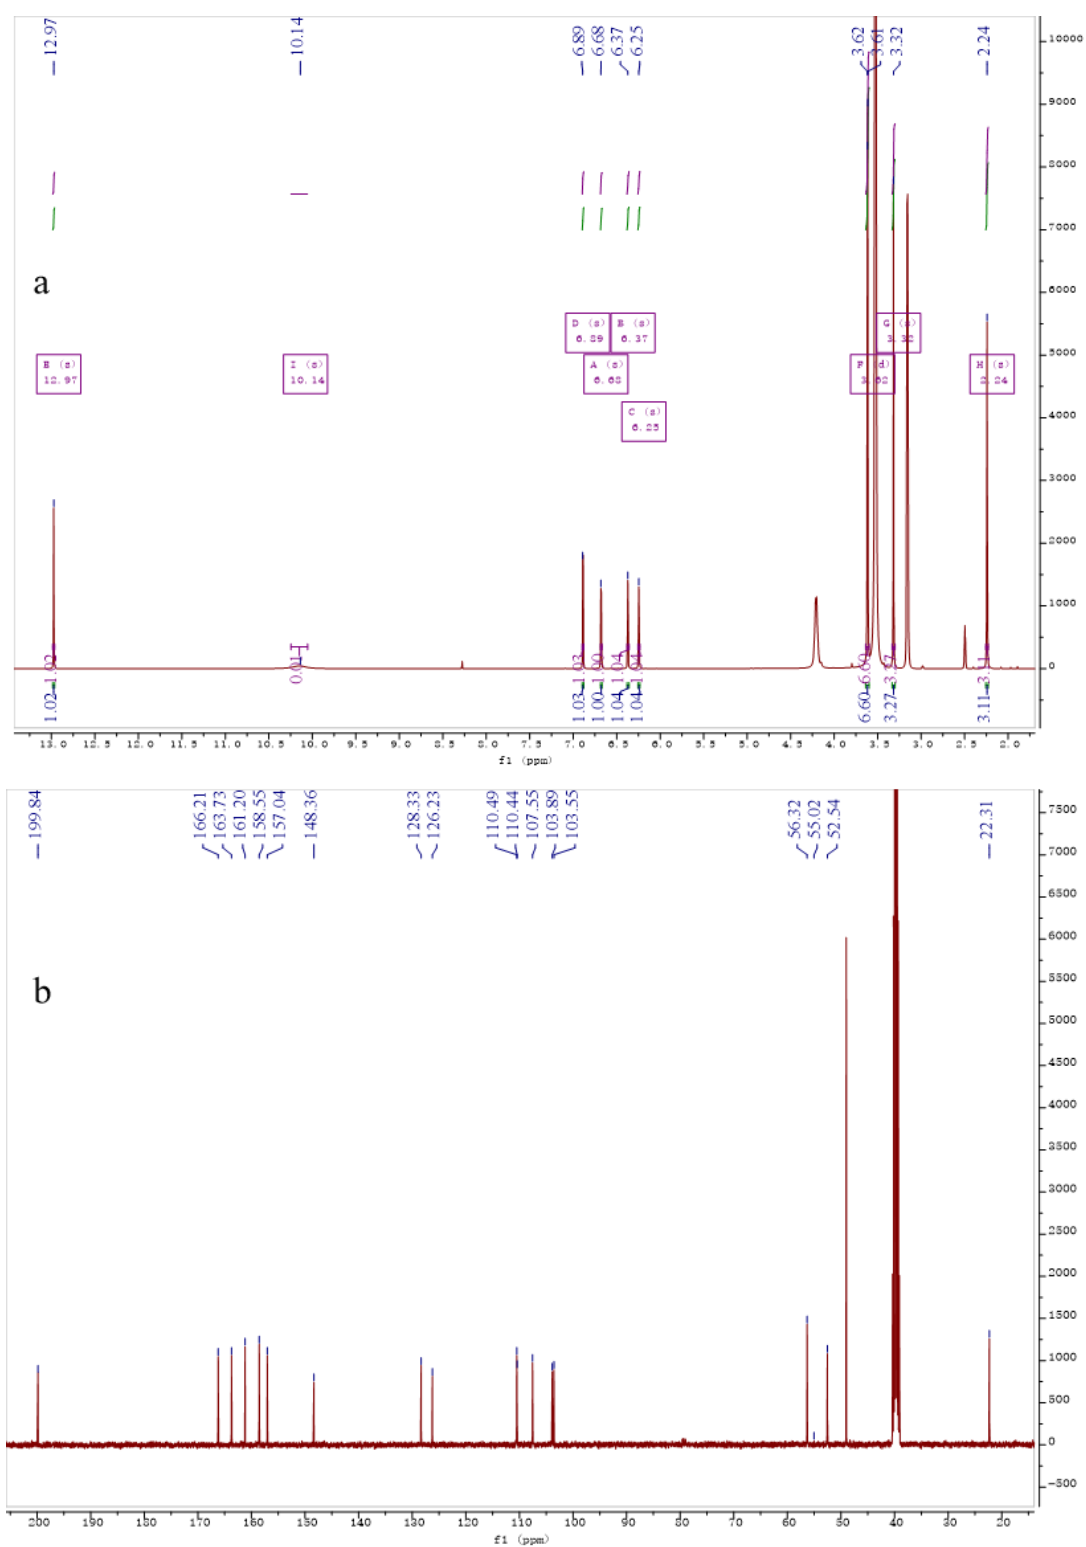

**Figure S9**  $^1\text{H}$  (a) and  $^{13}\text{C}$  (b) NMR spectrum of 1,2-seco-trypacidin (**6**).

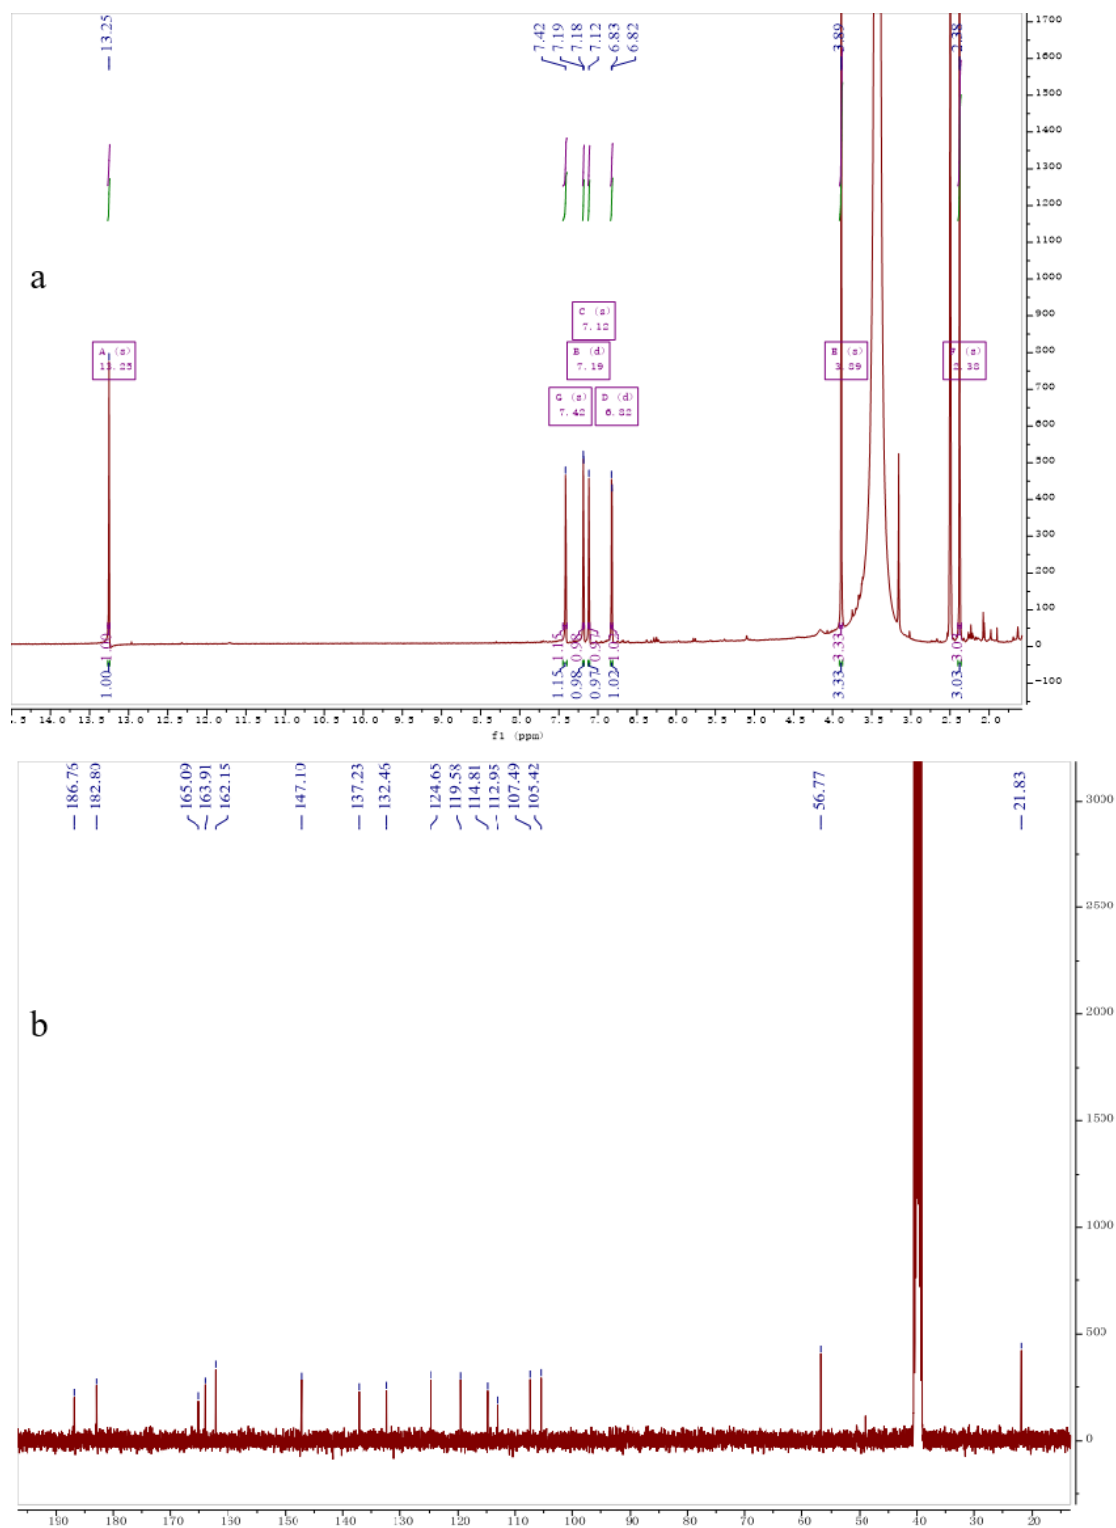

**Figure S10**  $^1\text{H}$  (a) and  $^{13}\text{C}$  (b) NMR spectrum of questin (**7**).

**Table S3**  $^1\text{H}$  and  $^{13}\text{C}$  NMR data of compounds **1** and **7** ( $\delta$  in ppm).

| No.   | <b>1</b> (In $\text{CD}_3\text{OD}$ ) |                                | <b>7</b> (In $\text{DMSO-d}_6$ ) |                                |
|-------|---------------------------------------|--------------------------------|----------------------------------|--------------------------------|
|       | $\delta_{\text{H}}^{\text{a}}$        | $\delta_{\text{C}}^{\text{b}}$ | $\delta_{\text{H}}^{\text{a}}$   | $\delta_{\text{C}}^{\text{b}}$ |
| 1     | 1.19 t                                | 45.33 $\text{CH}_2$            |                                  | 162.15 C                       |
| 2     | 2.66 m                                | 50.86 $\text{CH}_2$            | 7.12 s                           | 124.65 CH                      |
| 3     |                                       | 181.44 C                       |                                  | 147.10 C                       |
| 3-Me  |                                       |                                | 2.38 s                           | 21.83 $\text{CH}_3$            |
| 4     | 5.99 s                                | 130.61 CH                      | 7.42 s                           | 119.58 CH                      |
| 5     |                                       | 210.97 C                       | 7.19 s                           | 107.49 CH                      |
| 6     | 3.46 d                                | 51.13 CH                       |                                  | 165.09 C                       |
| 7     |                                       | 141.42 C                       | 6.82 s                           | 105.42 CH                      |
| 8     | 6.91 d                                | 159.76 CH                      |                                  | 163.91 C                       |
| 8-OMe |                                       |                                | 3.89 s                           | 56.77 $\text{CH}_3$            |
| 9     | 2.93 d                                | 32.09 $\text{CH}_2$            |                                  | 186.76 C                       |
| 10    | 2.61 m                                | 44.83 CH                       |                                  | 182.80 C                       |
| 11    |                                       | 46.68 C                        |                                  | 137.23 C                       |
| 12    | 1.49 m; 1.52 m                        | 46.42 $\text{CH}_2$            |                                  | 112.95 C                       |
| 13    | 1.28 m                                | 28.72 $\text{CH}_2$            |                                  | 114.81 C                       |
| 14    | 1.87 m                                | 50.29 CH                       |                                  | 132.46 C                       |
| 15    | 2.68 m                                | 33.80 CH                       |                                  |                                |
| 16    | 5.21 t                                | 137.31 CH                      |                                  |                                |
| 17    | 6.13 t                                | 124.80 CH                      |                                  |                                |
| 18    | 5.99 t                                | 121.44 CH                      |                                  |                                |
| 19    |                                       | 136.92 C                       |                                  |                                |
| 20    | 2.11 s                                | 17.20 $\text{CH}_3$            |                                  |                                |
| 21    | 9.19 s                                | 194.78 CH                      |                                  |                                |
| 22    | 0.90 s                                | 23.19 $\text{CH}_3$            |                                  |                                |
| 23    | 0.97 d                                | 21.65 $\text{CH}_3$            |                                  |                                |
| 24    | 1.76 s                                | 18.16 $\text{CH}_3$            |                                  |                                |
| 25    | 1.84 s                                | 26.55 $\text{CH}_3$            |                                  |                                |

a Recorded at 400 MHz; b Recorded at 100 MHz.

**Table S4** <sup>1</sup>H and <sup>13</sup>C NMR data of compounds **2–4** (δ in ppm).

| No.   | <b>2</b> (In CDCl <sub>3</sub> ) |                             | <b>3</b> (In CDCl <sub>3</sub> ) |                             | <b>4</b> (In CDCl <sub>3</sub> ) |                             |
|-------|----------------------------------|-----------------------------|----------------------------------|-----------------------------|----------------------------------|-----------------------------|
|       | δ <sub>H</sub> <sup>a</sup>      | δ <sub>C</sub> <sup>b</sup> | δ <sub>H</sub> <sup>a</sup>      | δ <sub>C</sub> <sup>b</sup> | δ <sub>H</sub> <sup>a</sup>      | δ <sub>C</sub> <sup>b</sup> |
| 2     |                                  | 145.34 C                    |                                  | 145.34 C                    |                                  | 145.67 C                    |
| 3     |                                  | 183.59 C                    |                                  | 183.40 C                    |                                  | 182.39 C                    |
| 3a    |                                  | 121.28 C                    |                                  | 121.42 C                    |                                  | 119.47 C                    |
| 4     | 7.53 d                           | 122.02 CH                   | 7.53 d                           | 122.14 CH                   | 7.78 d                           | 124.42 CH                   |
| 5     | 6.85 d                           | 123.16 CH                   | 6.87 d                           | 123.34 CH                   | 7.36 d                           | 119.78 CH                   |
| 5a    |                                  | 140.77 C                    |                                  | 140.71 C                    |                                  | 141.48 C                    |
| 6     | 3.00 dd                          | 39.38 CH <sub>2</sub>       | 2.93 dd                          | 38.77 CH <sub>2</sub>       | 7.55 s                           | 120.69 CH                   |
| 7     |                                  | 97.50 C                     |                                  | 94.96 C                     |                                  | 156.66 C                    |
| 9     | 4.93 dd                          | 57.86 CH <sub>2</sub>       | 4.92 dd                          | 57.77 CH <sub>2</sub>       | 9.51 s                           | 146.28 CH                   |
| 9a    |                                  | 118.29 C                    |                                  | 118.30 C                    |                                  | 114.70 C                    |
| 9b    |                                  | 160.45 C                    |                                  | 160.52 C                    |                                  | 164.12 C                    |
| 10    | 1.53 s                           | 23.10 CH <sub>3</sub>       | 1.63 s                           | 29.39 CH <sub>3</sub>       | 2.75 s                           | 24.74 CH <sub>3</sub>       |
| 11    |                                  | 131.85 C                    |                                  | 132.22 C                    |                                  | 134.22 C                    |
| 12    | 2.09 s                           | 20.31 CH <sub>3</sub>       | 2.09 s                           | 17.58 CH <sub>3</sub>       | 2.43 s                           | 17.71 CH <sub>3</sub>       |
| 13    | 2.36 s                           | 17.53 CH <sub>3</sub>       | 2.36 s                           | 20.37 CH <sub>3</sub>       | 2.55 s                           | 20.59 CH <sub>3</sub>       |
| 7-OMe | 3.55 s                           | 49.13 CH <sub>3</sub>       |                                  |                             |                                  |                             |

a Recorded at 400 MHz; b Recorded at 100 MHz.

**Table S5** <sup>1</sup>H and <sup>13</sup>C NMR data NMR data of compounds **5** and **6** (δ in ppm).

| No.      | <b>5</b> (In CDCl <sub>3</sub> ) |                             | <b>6</b> (In DMSO-d <sub>6</sub> ) |                             |
|----------|----------------------------------|-----------------------------|------------------------------------|-----------------------------|
|          | δ <sub>H</sub> <sup>a</sup>      | δ <sub>C</sub> <sup>b</sup> | δ <sub>H</sub> <sup>a</sup>        | δ <sub>C</sub> <sup>b</sup> |
| 2        |                                  | 84.04 C                     |                                    | 126.23 C                    |
| 3        |                                  | 190.63 C                    |                                    | 199.84 C                    |
| 3a       |                                  | 108.16 C                    |                                    | 110.44 C                    |
| 4        |                                  | 158.31 C                    |                                    | 161.20 C                    |
| 5        | 6.34 s                           | 105.37 CH                   | 6.37 s                             | 110.49 CH                   |
| 6        |                                  | 152.44 C                    |                                    | 148.36 C                    |
| 6a       | 2.40 s                           | 23.16 CH <sub>3</sub>       | 2.24 s                             | 22.31 CH <sub>3</sub>       |
| 7        | 6.51 s                           | 105.54 CH                   | 6.68 s                             | 103.89 CH                   |
| 7a       |                                  | 174.33 C                    |                                    | 163.73 C                    |
| 1'       |                                  | 138.40 C                    |                                    | 128.33 C                    |
| 2'       | 7.06 s                           | 136.97 CH                   | 6.89 s                             | 107.55 CH                   |
| 3'       |                                  | 185.96 C                    |                                    | 158.55 C                    |
| 4'       | 5.73 s                           | 103.80 CH                   | 6.25 s                             | 103.55 CH                   |
| 5'       |                                  | 169.72 C                    |                                    | 157.04C                     |
| 1'-COOMe |                                  | 163.46 C                    |                                    | 166.21 C                    |
| 4-OMe    | 3.90 s                           | 56.04 CH <sub>3</sub>       | 3.32 s                             | 52.54CH <sub>3</sub>        |
| 5'-OMe   | 3.62 s                           | 56.82 CH <sub>3</sub>       | 3.62 s                             | 56.32CH <sub>3</sub>        |
| 1'-COOMe | 3.64 s                           | 52.86 CH <sub>3</sub>       | 3.61 s                             | 55.02 CH <sub>3</sub>       |

a Recorded at 400 MHz; b Recorded at 100 MHz.

## References

- Ding, J.J.; Zhou, G.J.; Chen, X.J.; Xu, W.; Gao, X.M.; Zhang, Y.Z.; Jiang, B.; Li, H.F.; Wang, K.L. Analysis of microbial diversity and community structure of rhizosphere soil of three *Astragalus* species grown in special high-cold environment of northwestern Yunnan, China. *Microorganisms* **2024**, *12*, 539.
